# Supplementary material for: Automated and quantitative assessment of aortic root based on cardiac computed tomography angiography using a new deep-learning tool: a comparison study
Source: PubMed Central journal article supplement — Quant Imaging Med Surg. 2024 Nov 11;14(12):8414–28. doi: 10.21037/qims-24-650 (PMC11651967; doi:10.21037/qims-24-650), 2024-11-11
Supplement: qims-14-12-8414-rc.pdf [file qims-14-12-8414-rc.pdf]

## GRRAS (Guidelines for Reporting Reliability and Agreement Studies) Checklist

| Item to be reported       | Reported on Page Number/Line Number                                                                                                         | Reported on Section/Paragraph |
|---------------------------|---------------------------------------------------------------------------------------------------------------------------------------------|-------------------------------|
| <b>TITLE AND ABSTRACT</b> |                                                                                                                                             |                               |
| 1                         | Identify in title or abstract that interrater/intrarater reliability or agreement was investigated.                                         |                               |
| <b>INTRODUCTION</b>       |                                                                                                                                             |                               |
| 2                         | Name and describe the diagnostic or measurement device of interest explicitly.                                                              |                               |
| 3                         | Specify the subject population of interest.                                                                                                 |                               |
| 4                         | Specify the rater population of interest (if applicable).                                                                                   |                               |
| 5                         | Describe what is already known about reliability and agreement and provide a rationale for the study (if applicable).                       |                               |
| <b>METHODS</b>            |                                                                                                                                             |                               |
| 6                         | Explain how the sample size was chosen. State the determined number of raters, subjects/objects, and replicate observations.                |                               |
| 7                         | Describe the sampling method.                                                                                                               |                               |
| 8                         | Describe the measurement/rating process (e.g. time interval between repeated measurements, availability of clinical information, blinding). |                               |
| 9                         | State whether measurements/ratings were conducted independently.                                                                            |                               |
| 10                        | Describe the statistical analysis.                                                                                                          |                               |
| <b>RESULTS</b>            |                                                                                                                                             |                               |
| 11                        | State the actual number of raters and subjects/objects which were included and the number of replicate observations which were conducted.   |                               |
| 12                        | Describe the sample characteristics of raters and subjects (e.g. training, experience).                                                     |                               |
| 13                        | Report estimates of reliability and agreement including measures of statistical uncertainty.                                                |                               |
| <b>DISCUSSION</b>         |                                                                                                                                             |                               |
| 14                        | Discuss the practical relevance of results.                                                                                                 |                               |

|                           |                                                    |  |
|---------------------------|----------------------------------------------------|--|
| <b>AUXILIARY MATERIAL</b> |                                                    |  |
| 15                        | Provide detailed results if possible (e.g. online) |  |

|  |
|--|
|  |
|--|
