# Supplementary material for: Automated and quantitative assessment of aortic root based on cardiac computed tomography angiography using a new deep-learning tool: a comparison study
Source: PubMed Central journal article supplement — Quant Imaging Med Surg. 2024 Nov 11;14(12):8414–28. doi: 10.21037/qims-24-650 (PMC11651967; doi:10.21037/qims-24-650), 2024-11-11
Supplement: qims-14-12-8414-supplementary.pdf [file qims-14-12-8414-supplementary.pdf]

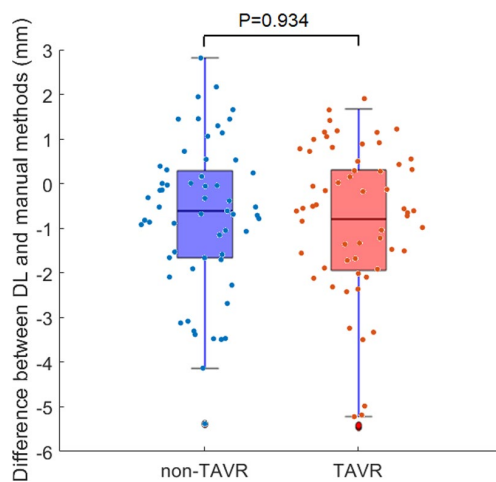

**Figure S1** Comparison of the differences of annulus diameters between DL and manual methods between non-TAVR and TAVR groups. DL, deep learning; TAVR, transcatheter aortic valve replacement.

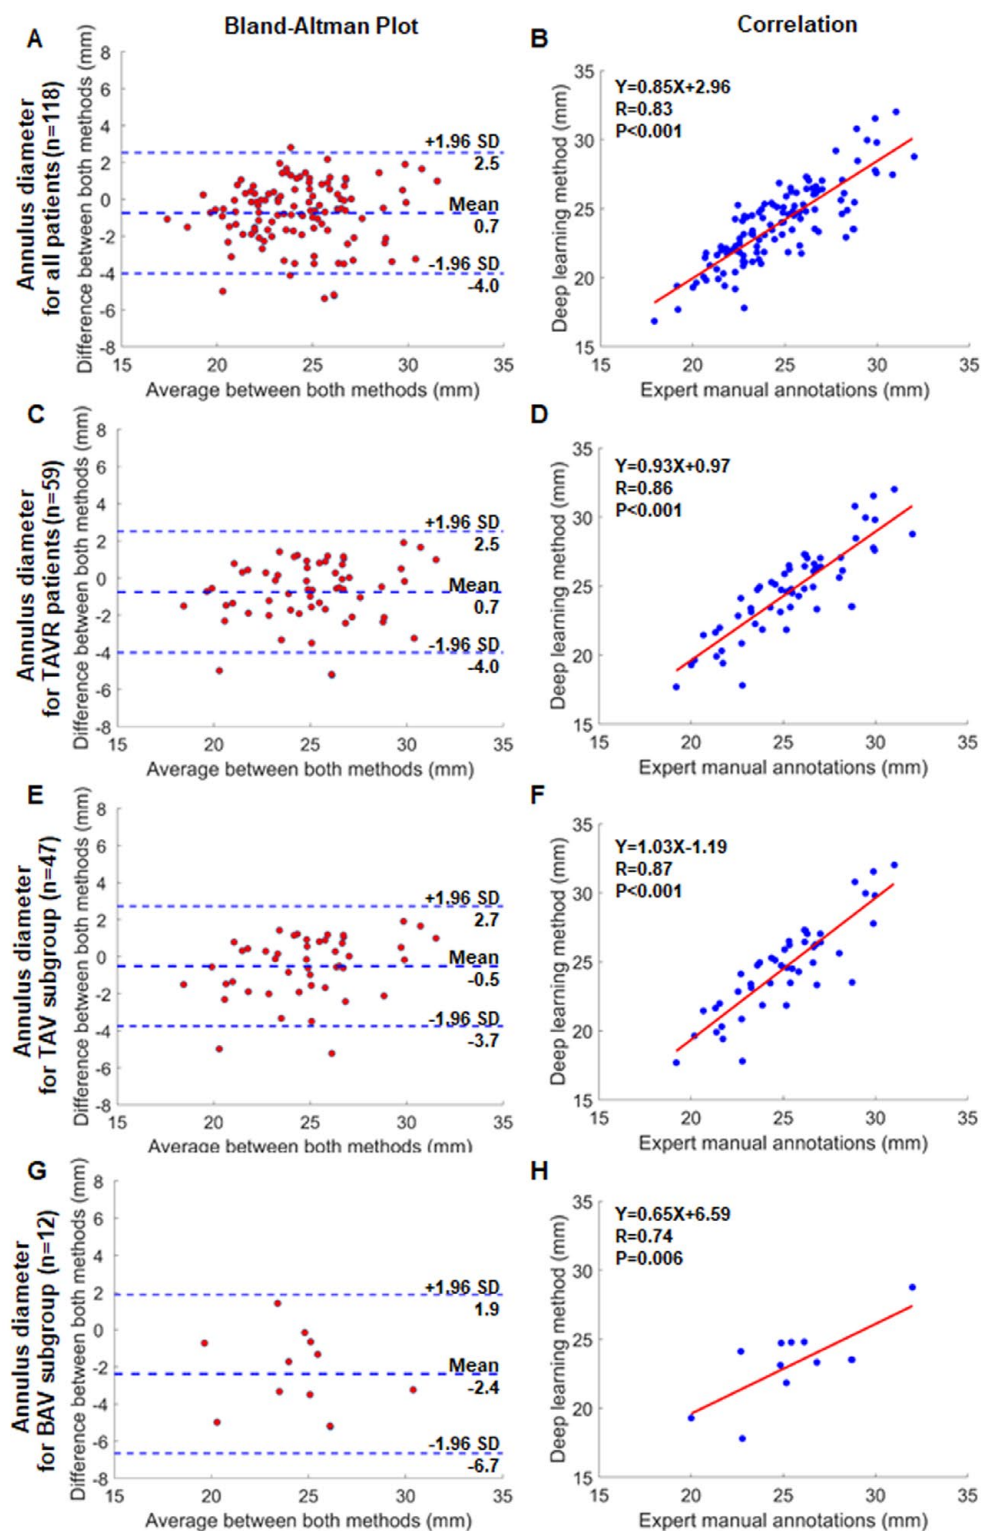

**Figure S2** Bland-Altman plots and scatterplots of new deep learning analysis versus expert manual measurement for aortic annular mean diameter in the overall patient population (A,B), TAVR group (C,D), TAV (E,F) and BAV subgroups (G,H). TAVR, transcatheter aortic valve replacement; TAV, tricuspid aortic valve; BAV, bicuspid aortic valve.

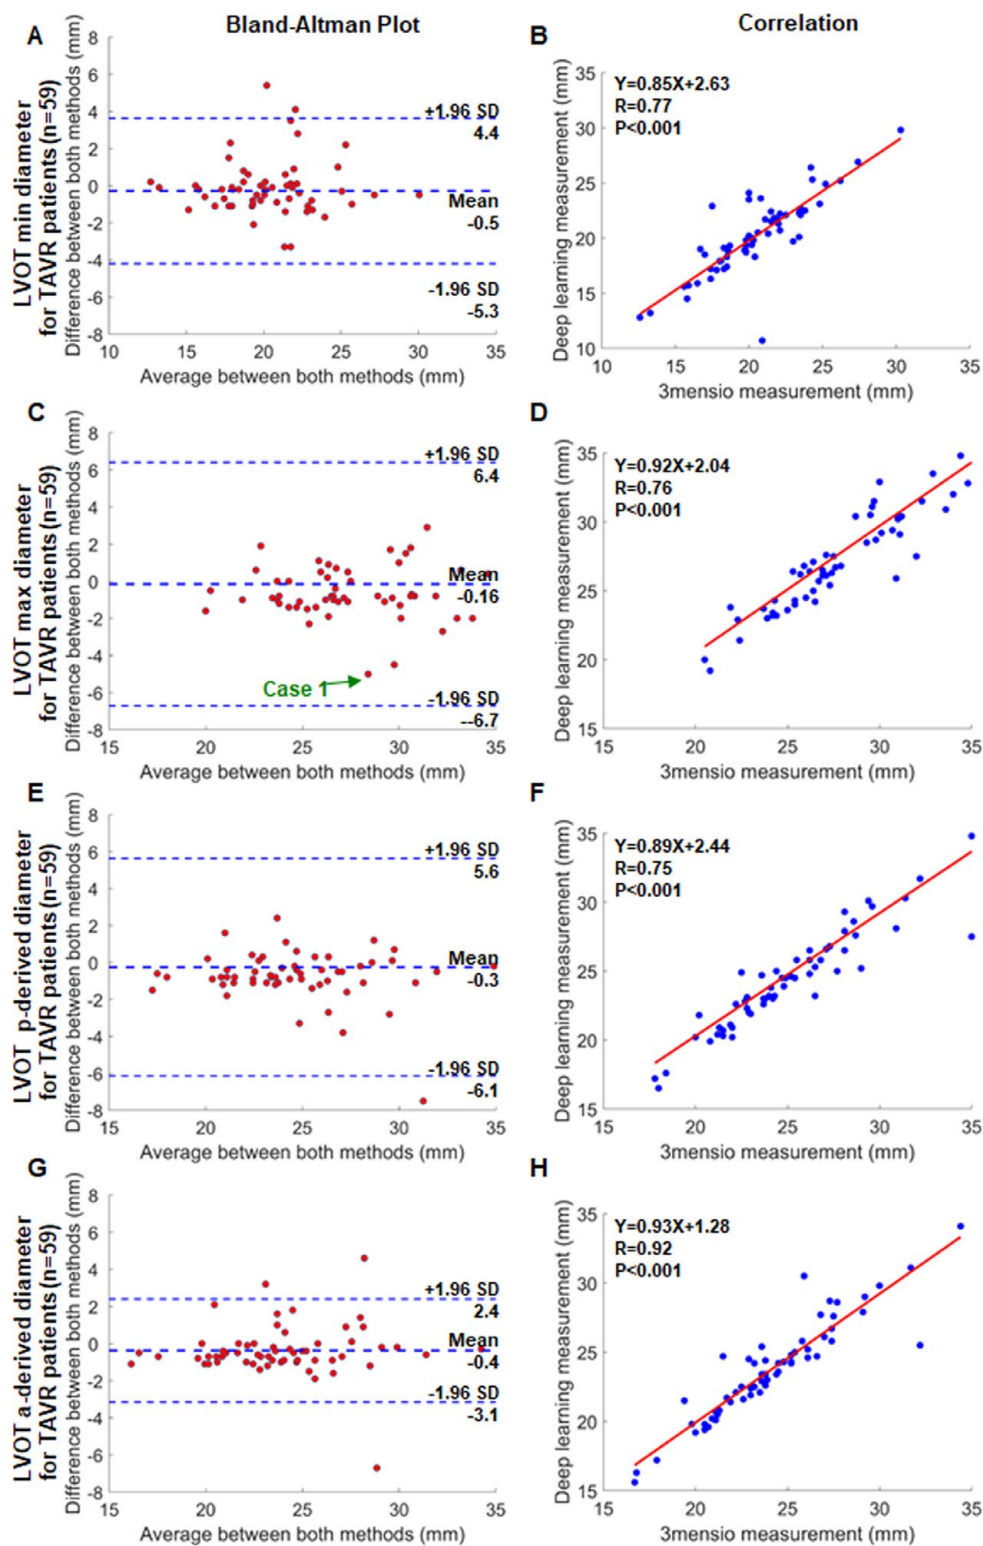

**Figure S3** Bland-Altman plots and scatterplots of new deep learning analysis versus 3mensio software measurements for LVOT minimum (A,B), maximum (C,D), perimeter-derived (E,F) and area-derived (G,H) diameter in the TAVR patients. LVOT, left ventricular outflow tract; TAVR, transcatheter aortic valve replacement.

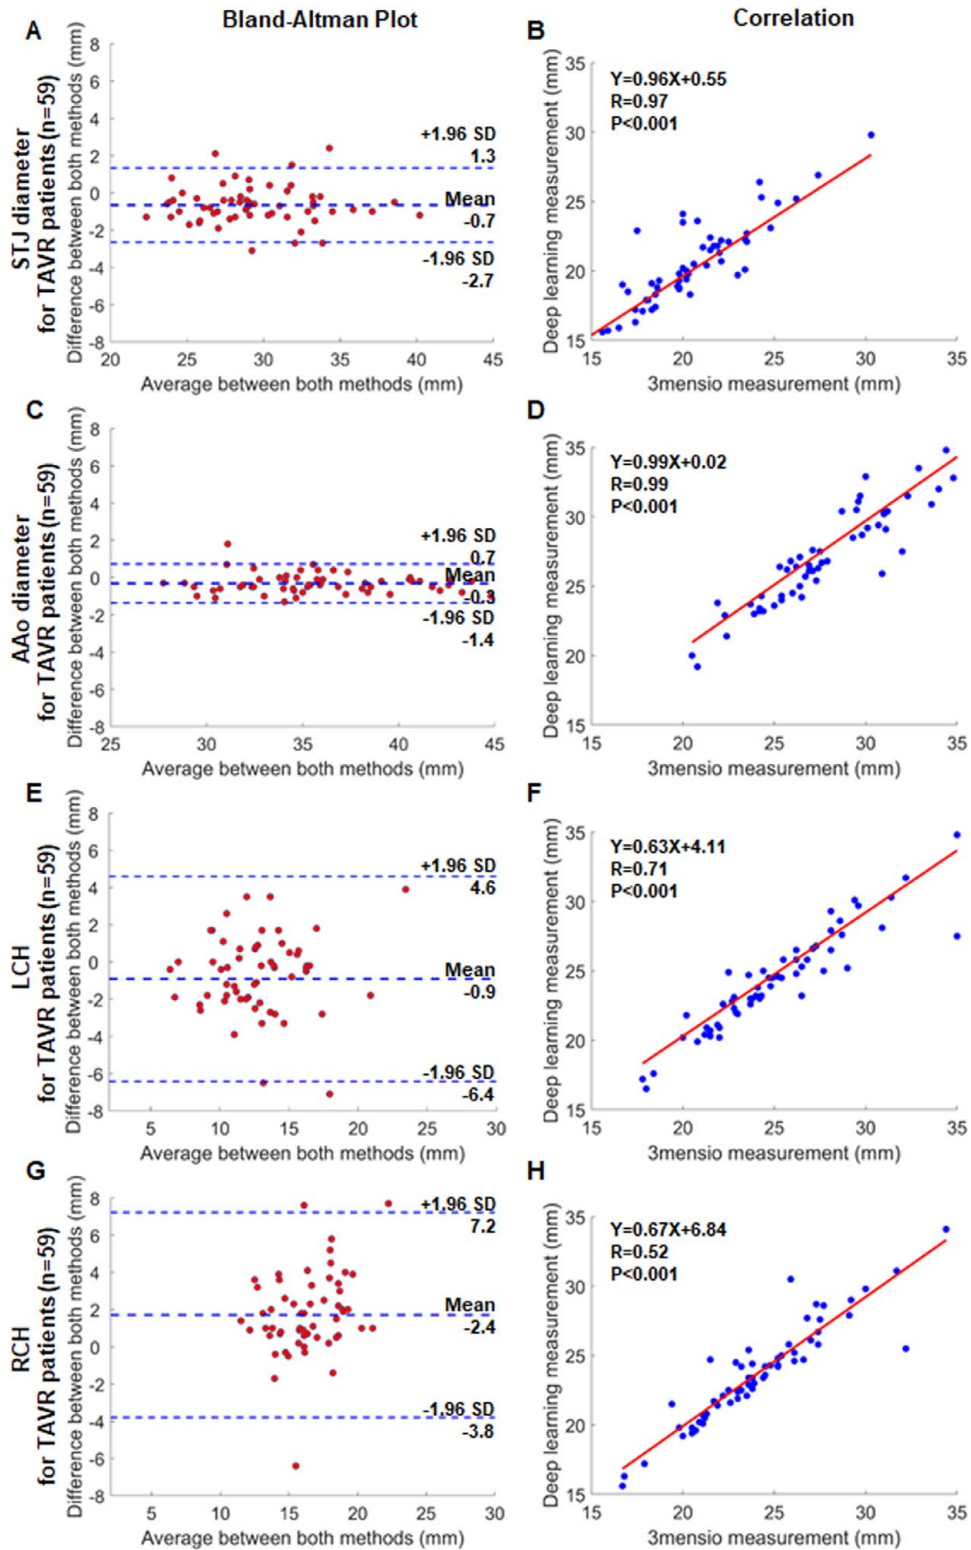

**Figure S4** Bland-Altman plots and scatterplots of new deep learning analysis versus 3mensio software measurements for STJ (A,B) and AAO (C,D) diameter, and left (E,F) and right (G,H) coronary ostium heights in the TAVR patients. TAVR, transcatheter aortic valve replacement; STJ, sinotubular junction; AAO, ascending aorta; LCH, height of left coronary ostium; RCH, height of right coronary ostium.

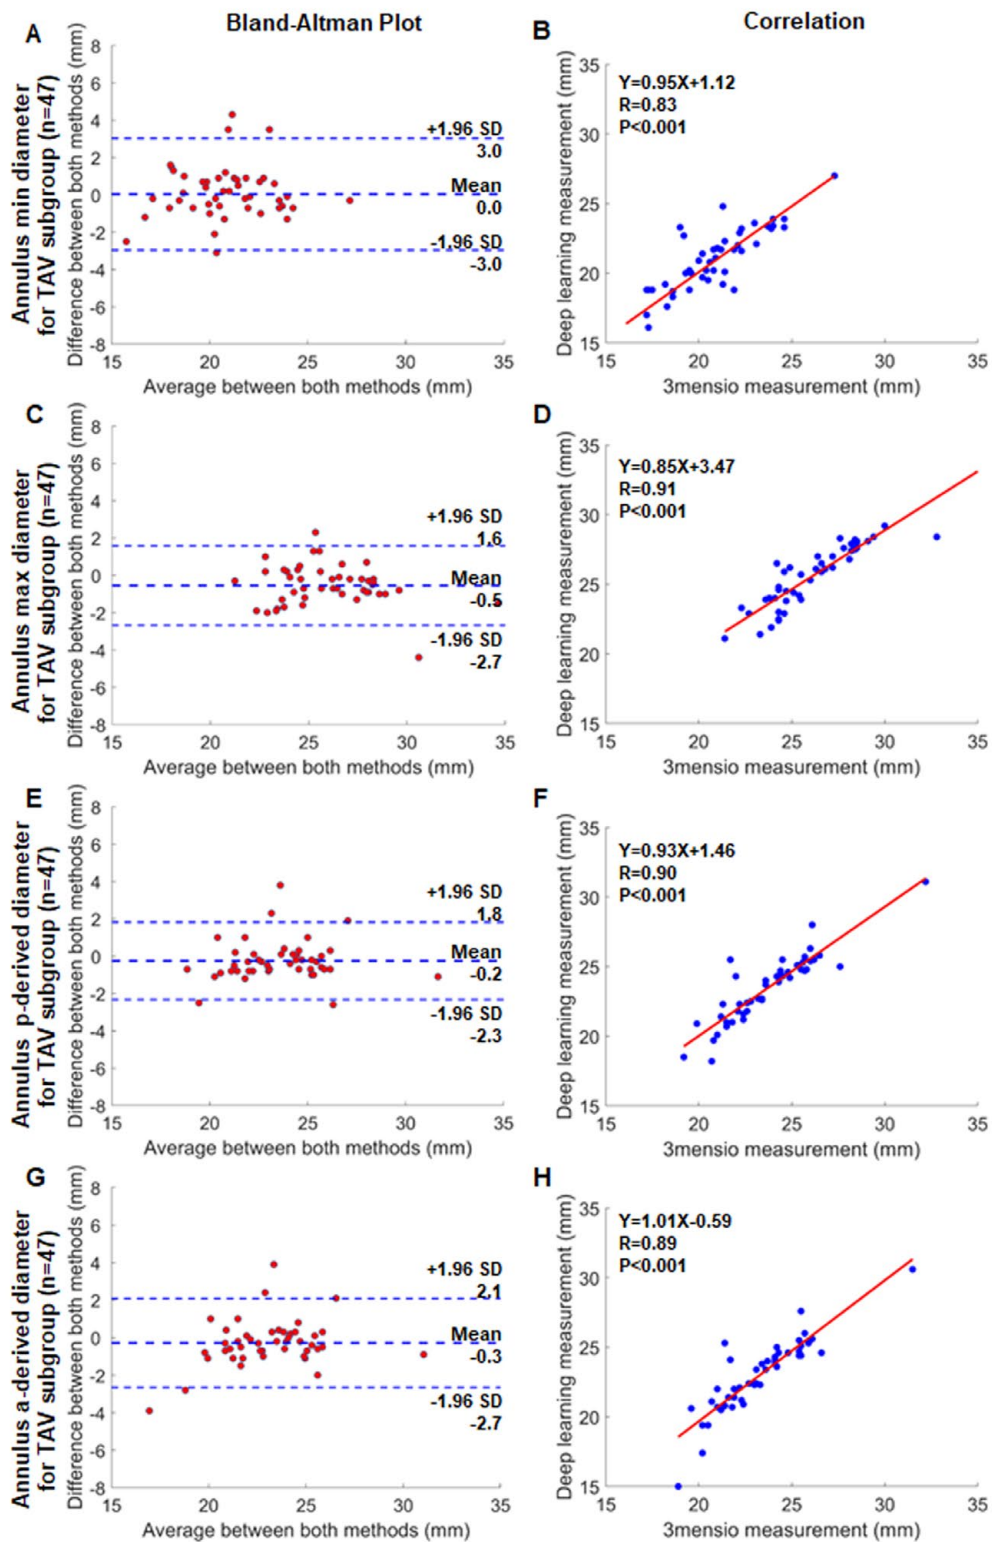

**Figure S5** Bland-Altman plots and scatterplots of new deep learning analysis versus 3mensio software measurements for annulus minimum (A,B), maximum (C,D), perimeter-derived (E,F) and area-derived (G,H) diameter in the TAV subgroup. TAV, tricuspid aortic valve.



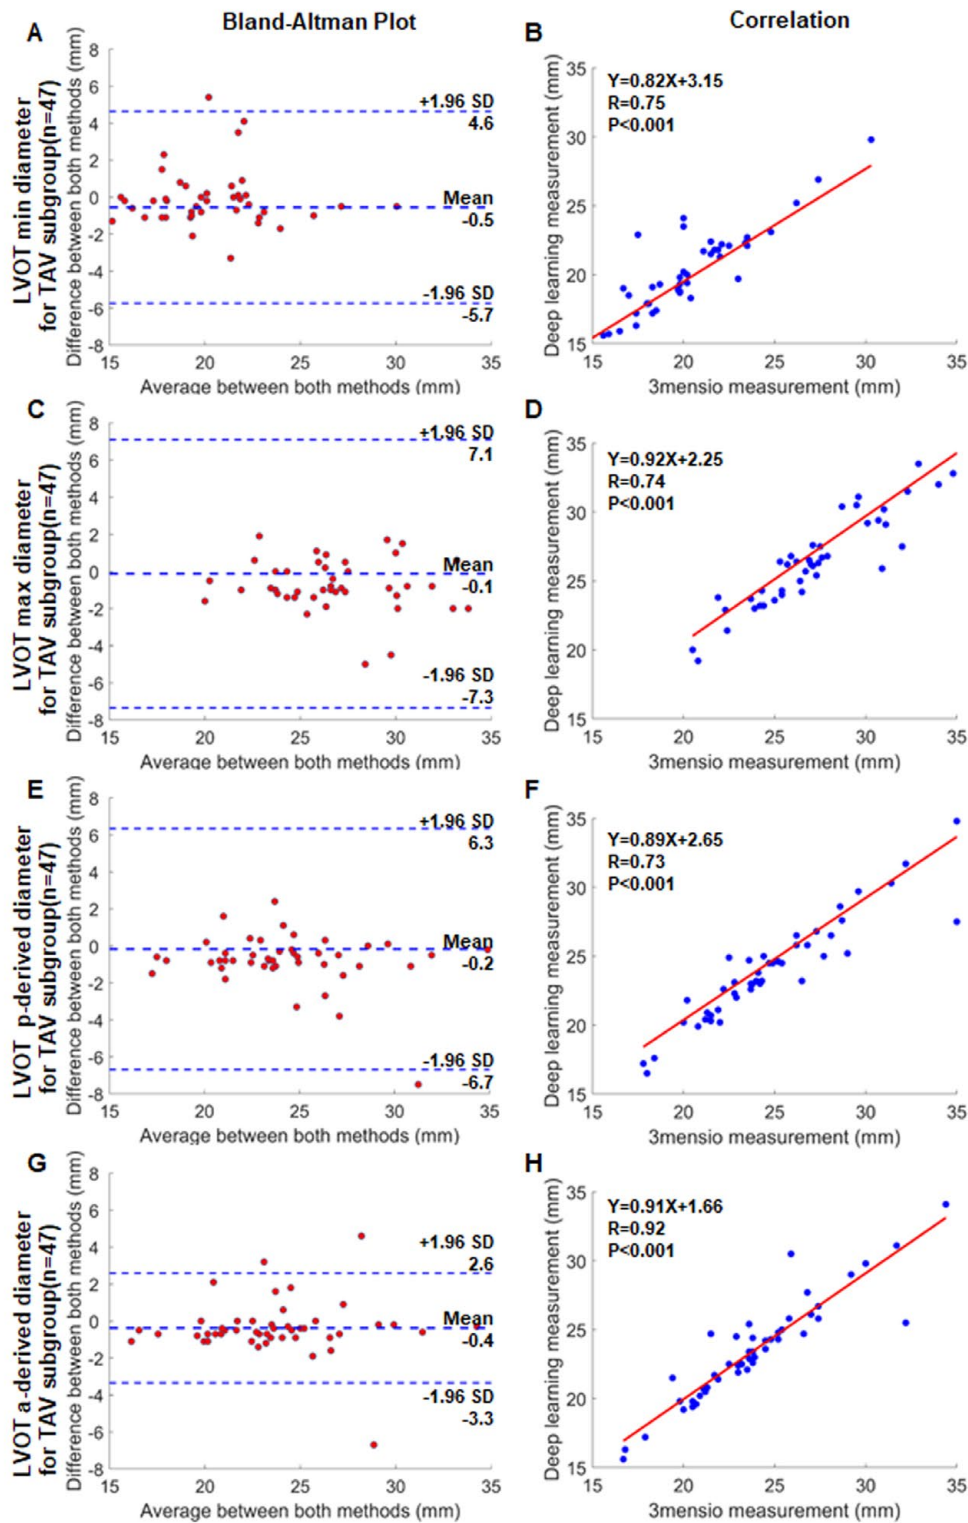

**Figure S6** Bland-Altman plots and scatterplots of new deep learning analysis versus 3mensio software measurements for LVOT minimum (A,B), maximum (C,D), perimeter-derived (E,F) and area-derived (G,H) diameter in the TAV subgroup. TAV, tricuspid aortic valve; LVOT, left ventricular outflow tract.

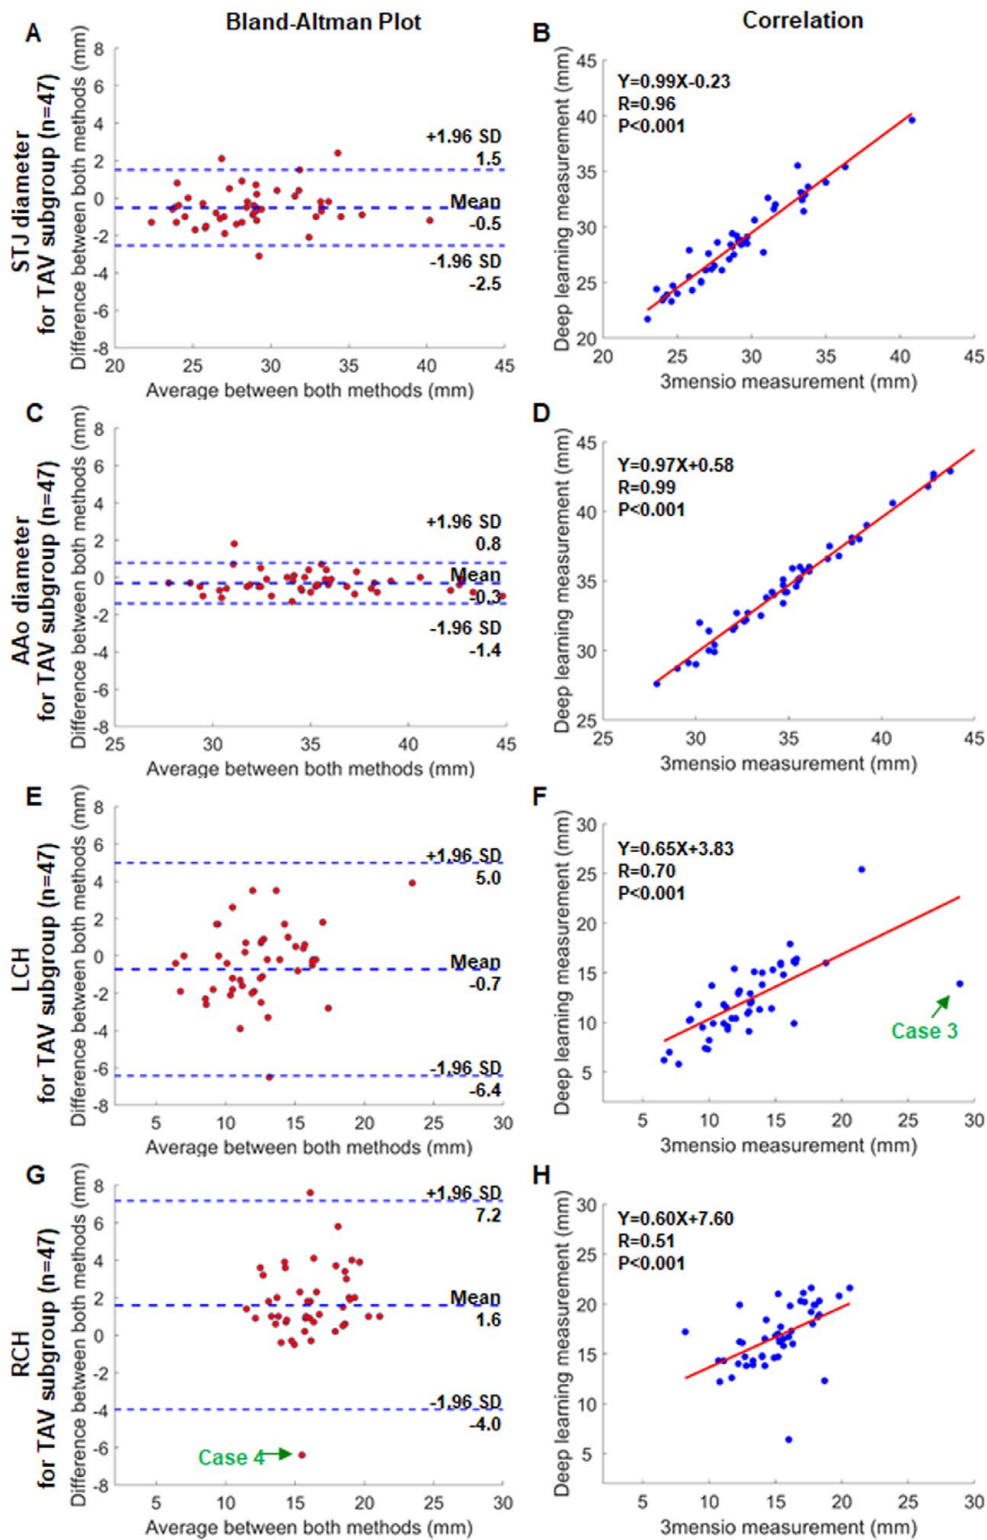

**Figure S7** Bland-Altman plots and scatterplots of new deep learning analysis versus 3mensio software measurements for STJ (A,B) and AAO (C,D) diameter, and left (E,F) and right (G,H) coronary ostium heights in the TAV subgroup. TAV, tricuspid aortic valve; STJ, sinotubular junction; AAO, ascending aorta; LCH, height of left coronary ostium; RCH, height of right coronary ostium.

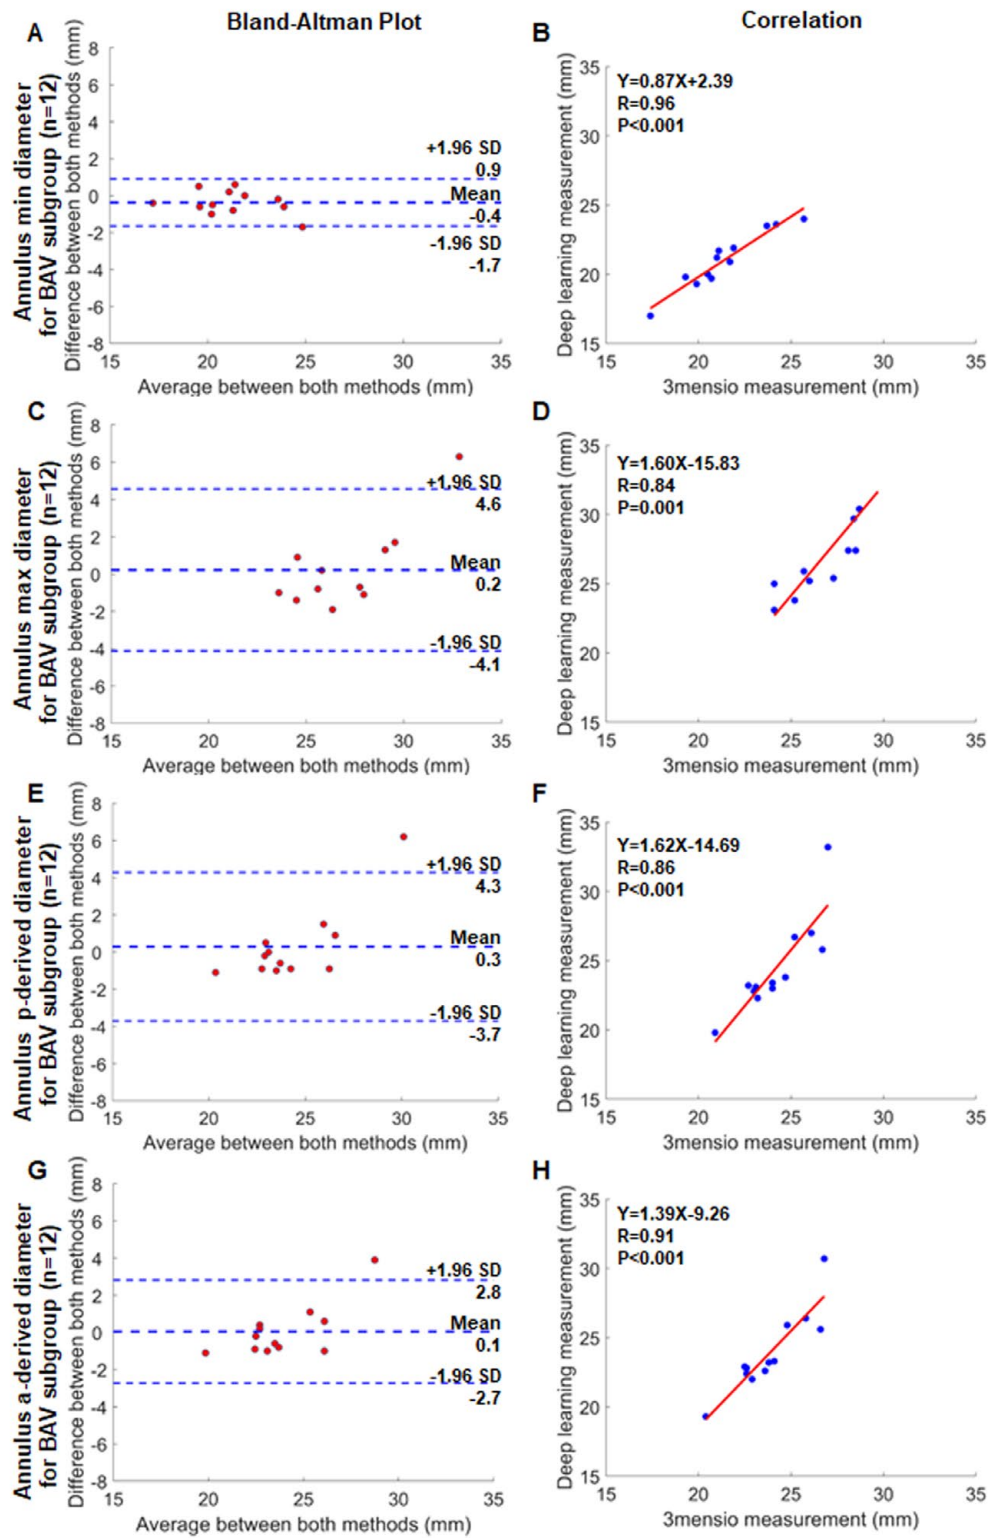

**Figure S8** Bland-Altman plots and scatterplots of new deep learning analysis versus 3mensio software measurements for annulus minimum (A,B), maximum (C,D), perimeter-derived (E,F) and area-derived (G,H) diameter in the BAV subgroup. BAV, bicuspid aortic valve.



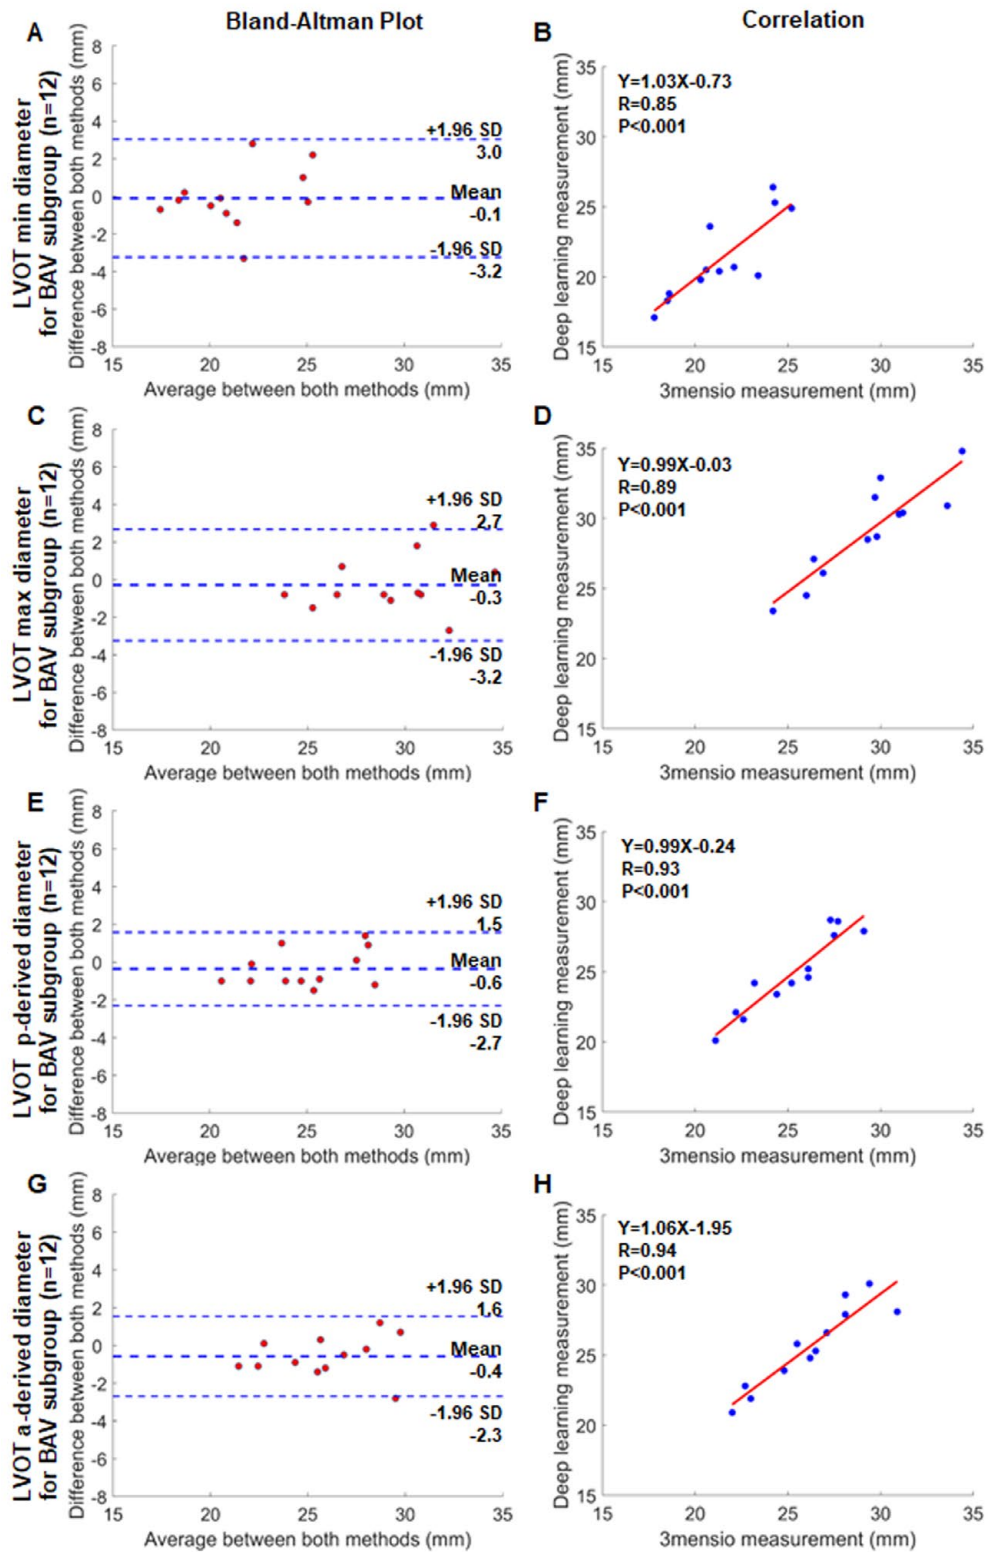

**Figure S9** Bland-Altman plots and scatterplots of new deep learning analysis versus 3mensio software measurements for LVOT minimum (A,B), maximum (C,D), perimeter-derived (E,F) and area-derived (G,H) diameter in the BAV subgroup. BAV, bicuspid aortic valve; LVOT, left ventricular outflow tract.

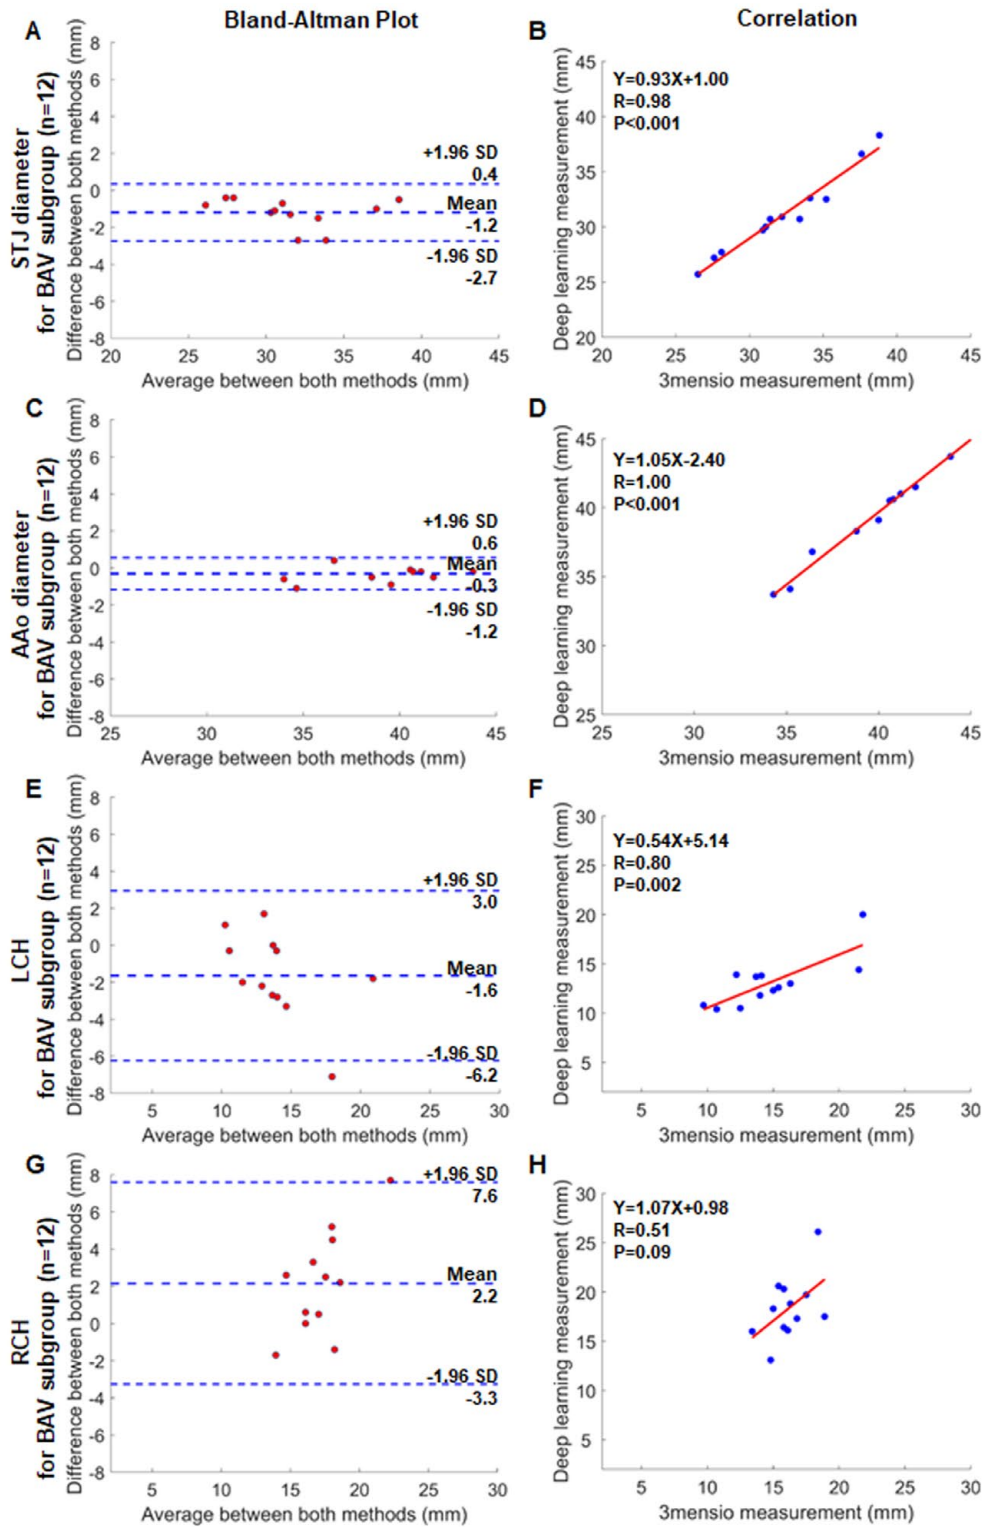

**Figure S10** Bland-Altman plots and scatterplots of new deep learning analysis versus 3mensio software measurements for STJ (A,B) and AAO (C,D) diameter, and left (E,F) and right (G,H) coronary ostium heights in the BAV subgroup. BAV, bicuspid aortic valve; STJ, sinotubular junction; AAO, ascending aorta; LCH, height of left coronary ostium; RCH, height of right coronary ostium.

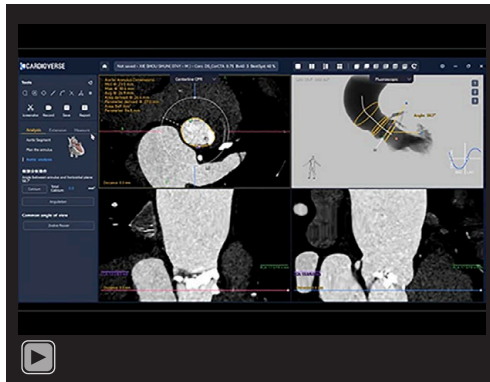

**Video S1** Fully automated measurement of aortic root by the deep learning system in 2 minutes.
